# Supplementary material
Source: PubMed Central journal article supplement (PMC9066071)
Supplement: EMBR-23-e53475-s005.pdf [file EMBR-23-e53475-s005.pdf]

## Expanded View Figures

### Figure EV1. miPEP31 does not affect the inhibitory function of T<sub>reg</sub> cells.

- A, B WT mice were treated with synthetic scPEP or miPEP31 at day 8 postimmunization every 2 days for three injections. FoxP3<sup>EGFP+</sup> T<sub>reg</sub> cells were sorted from splenocytes derived from mice treated with synthetic scPEP or miPEP31. The CellTrace™ Violet (CTV)-labeled memory T<sub>conv</sub> cells ( $1 \times 10^5$ ) were cultured in 96-well plates for 72 h together with a decreasing ratio of sorted T<sub>reg</sub> cells in the presence of anti-CD3 plus  $\gamma$ -irradiated antigen-presenting cells ( $1 \times 10^5$ ). The suppressive function of T<sub>reg</sub> cells was determined by the proliferation of activated responder T cells (T<sub>resp</sub>) on the basis of CTV dilution. Data in (B) are presented as mean  $\pm$  SEM of four biological replicates, ns, not significant (1:2 or 1:4 or 1:8 or 1:16 miPEP31 vs. scPEP), nonparametric one-way ANOVA, Kruskal–Wallis test.
- C–G Flow cytometric analysis of ICOS (C), LAG3 (D), GITR (E), and CTLA-4 (F) expression in T<sub>reg</sub>-cell induction in the presence of 10  $\mu$ M synthetic scPEP or miPEP31. Data in (G) are presented as mean  $\pm$  SEM of six biological replicates. ns, not significant (scPEP vs. miPEP31), unpaired two-tailed Student's t-test.

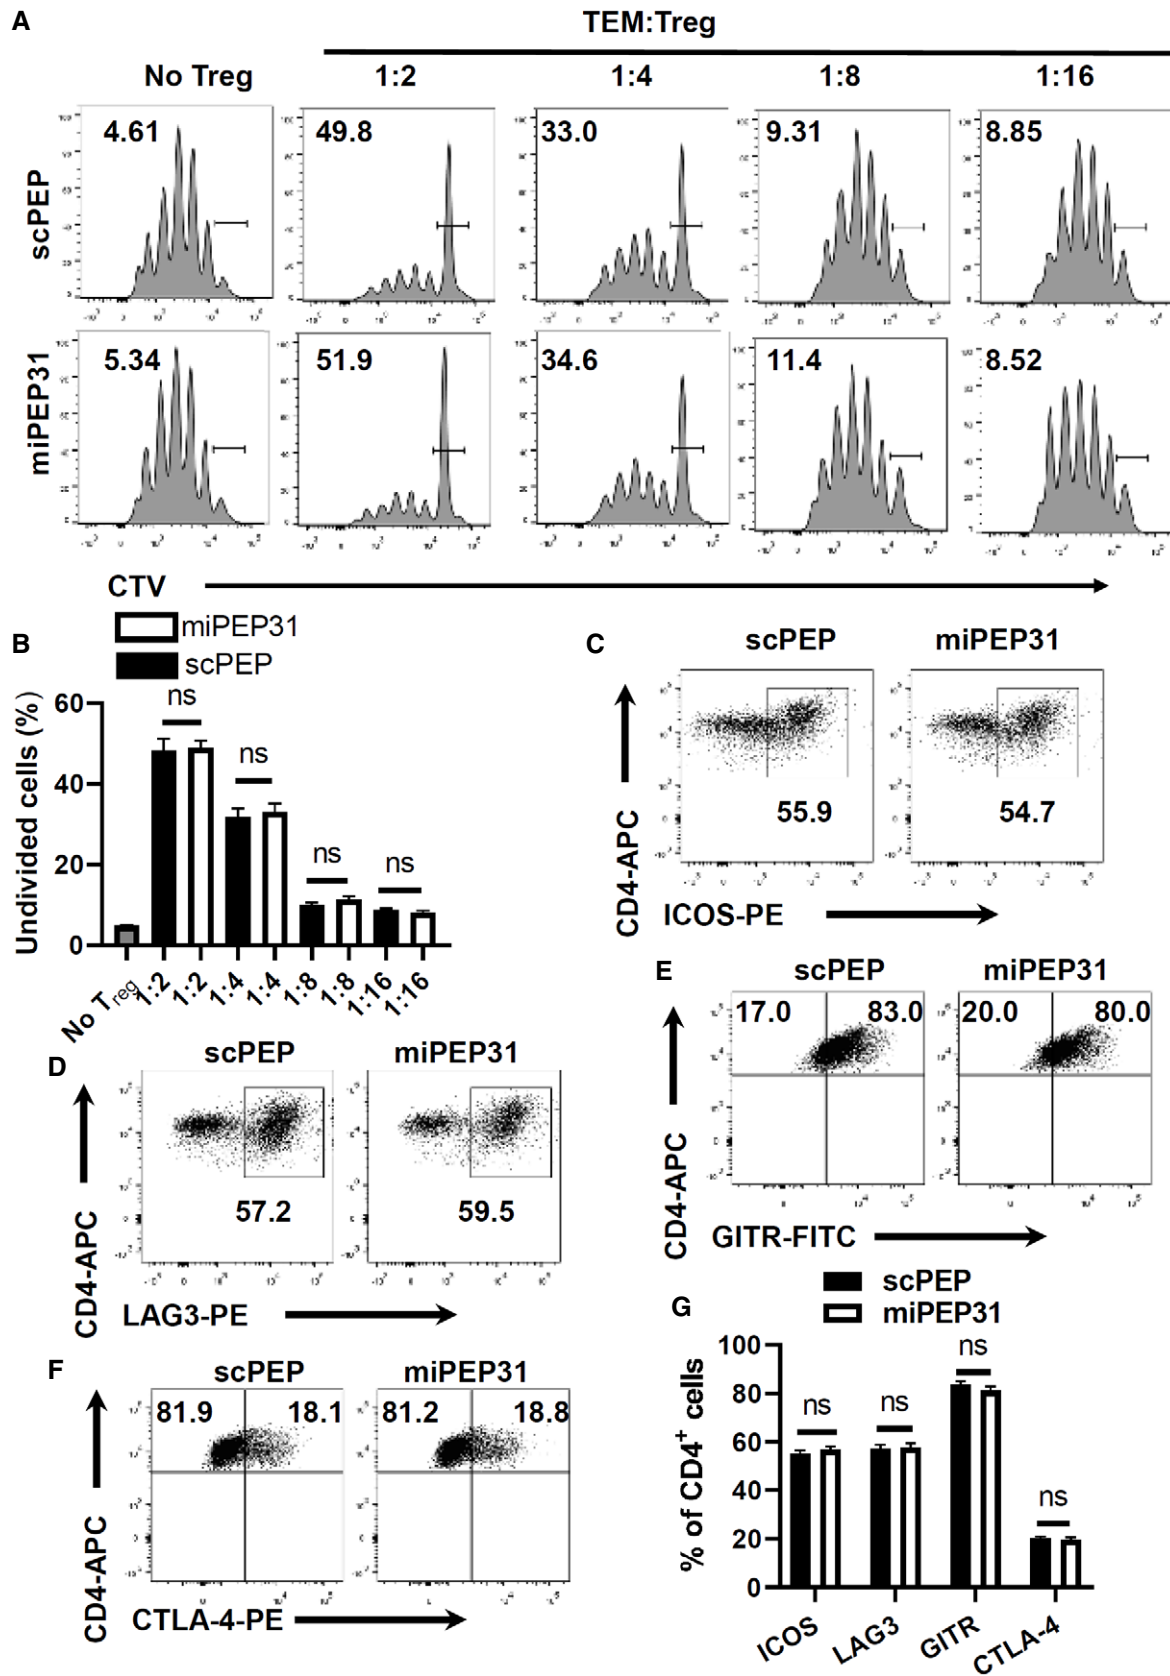

Figure EV1.

**Figure EV2. The role of miPEP31 in the induction of immune cells in EAE mice.**

- A–E EAE was induced by MOG<sub>35–55</sub>. scPEP or miPEP31 (50 µg) was injected intravenously every 2 days starting from day 8 postimmunization. Splenocytes from scPEP- or miPEP31-treated EAE mice were isolated on day 15 postimmunization and analyzed by flow cytometry. (A) B220 for total B lymphocytes. (B) CD3 for total T lymphocytes. (C) CD4 and CD8 for T-helper cells and cytotoxic T cells (gate on CD3<sup>+</sup> T cells). (D) CD11b for macrophages. (E) CD11c for dendritic cells. Data in (A–E) are presented as mean ± SEM of five biological replicates. ns, not significant, unpaired two-tailed Student's *t*-test.
- F–H EAE was induced by MOG<sub>35–55</sub> in FoxP3<sup>EGFP</sup> mice. scPEP or miPEP31 (50 µg) was injected intravenously every 2 days starting from day 8 postimmunization. Splenocytes of scPEP- or miPEP31-treated EAE mice were isolated on day 15 postimmunization. (F,H) Flow cytometric analysis of FoxP3<sup>EGFP+</sup> cells in CD4<sup>+</sup> T cells. (G) Flow cytometric analysis of IFN-γ<sup>+</sup> cells and IL-17<sup>+</sup> cells in CD4<sup>+</sup> T cells. Data in (H) are presented as mean ± SEM of five biological replicates. \*\**P* < 0.01, unpaired two-tailed Student's *t*-test.
- I Naive CD4<sup>+</sup> T cells were sorted from C57BL/6 mice and cultured in Th1, Th2, and Th17 polarizing medium for 3 days with 10 µM synthetic scPEP or miPEP31. The differentiation of Th1, Th2, and Th17 was analyzed by flow cytometry.

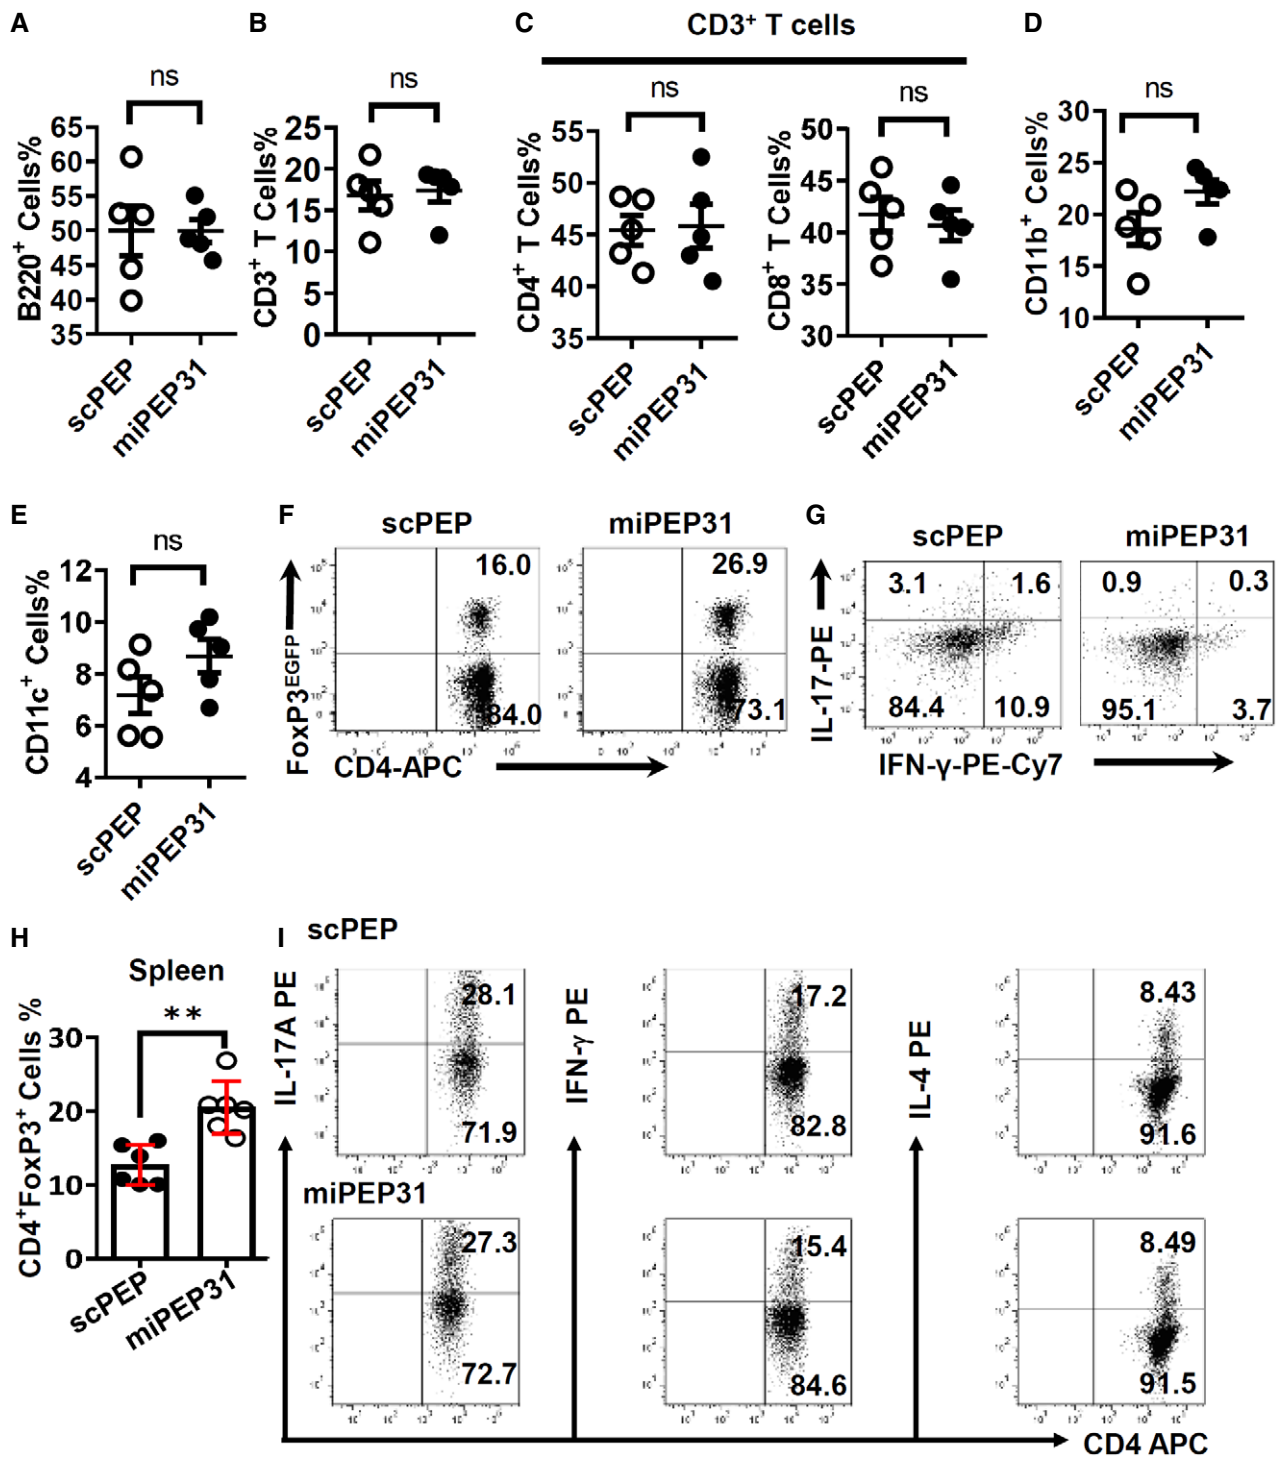

Figure EV2.

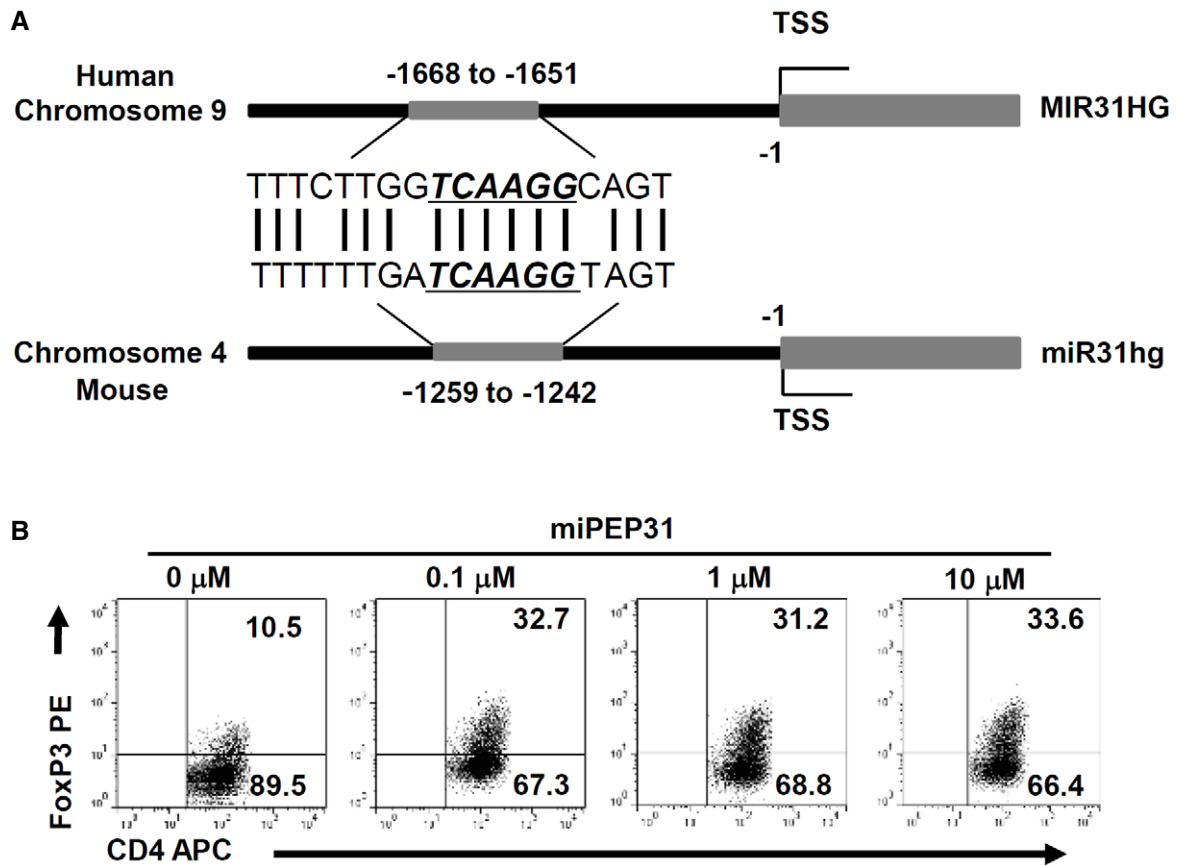

**Figure EV3. miPEP31 promotes the differentiation of human T<sub>reg</sub> cells.**

A Homologous alignment of miPEP31-binding site in human and mouse miR-31 host gene promoter.

B Flow cytometric analysis of human T<sub>reg</sub>-cell induction from CD4<sup>+</sup> T cells isolated from peripheral blood mononuclear cells in the presence of different doses of miPEP31. Shown in (B) is representative of three independent experiments.

**Figure EV4. Existence of the homologous peptide of miPEP31 in human HCT 116 cells.**

A miR-31 host gene in *Mus musculus*, *Rattus norvegicus*, *Homo sapiens*, and *Macaca mulatta*. The coding sequence of miPEP31 located on Exon 2 (106 bp, in blue) and Exon 3 (857 bp, in green) of mouse miR-31 host gene. The coding sequence of miPEP31 (under the green line) on Exon 3 is conserved across the four species.

B Workflow of mass spectrometry analysis to detect small peptides in HCT 116 cells. Protein lysates of HCT 116 cells were subjected to anti-miPEP31 immunoprecipitation. Purified lysates were subject to mass spectrometry analysis.

C Representative secondary mass spectrometry analysis of fragment. Identified fragment ions (632.85 Da, charge = 4) are indicated below the peptide sequence. Shown in (C) is representative of three independent experiments.

A

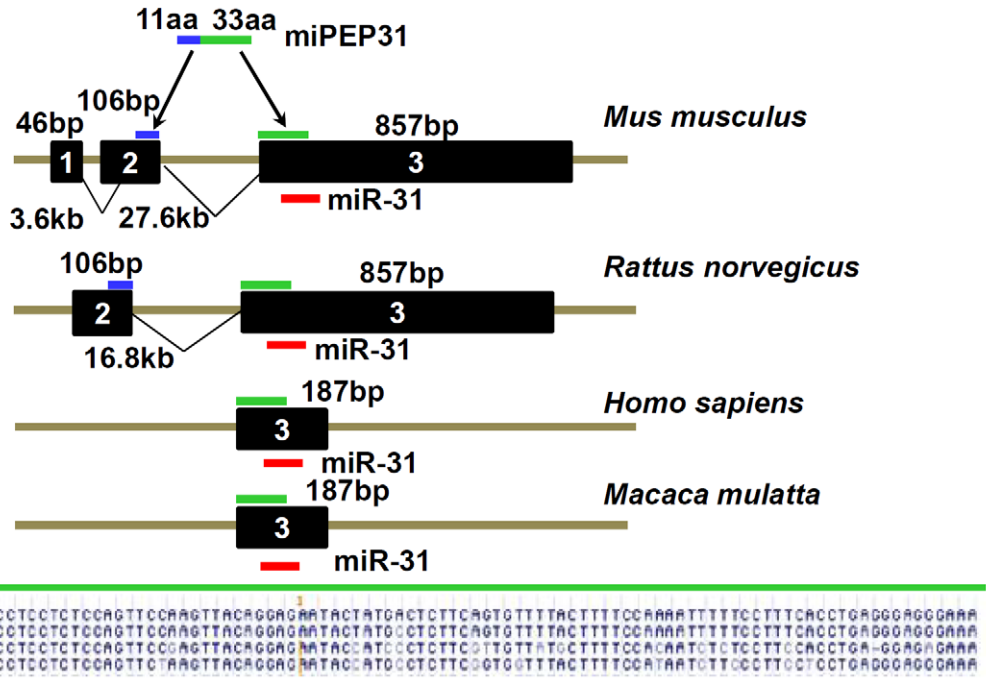

B

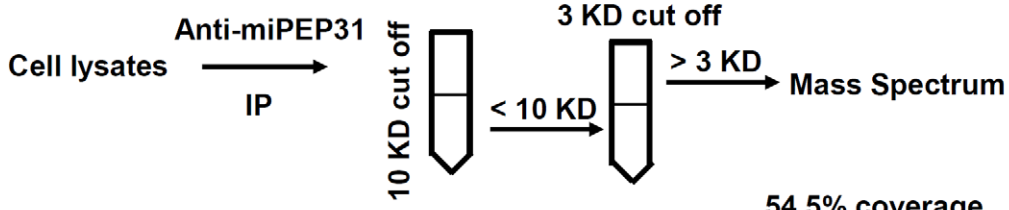

C

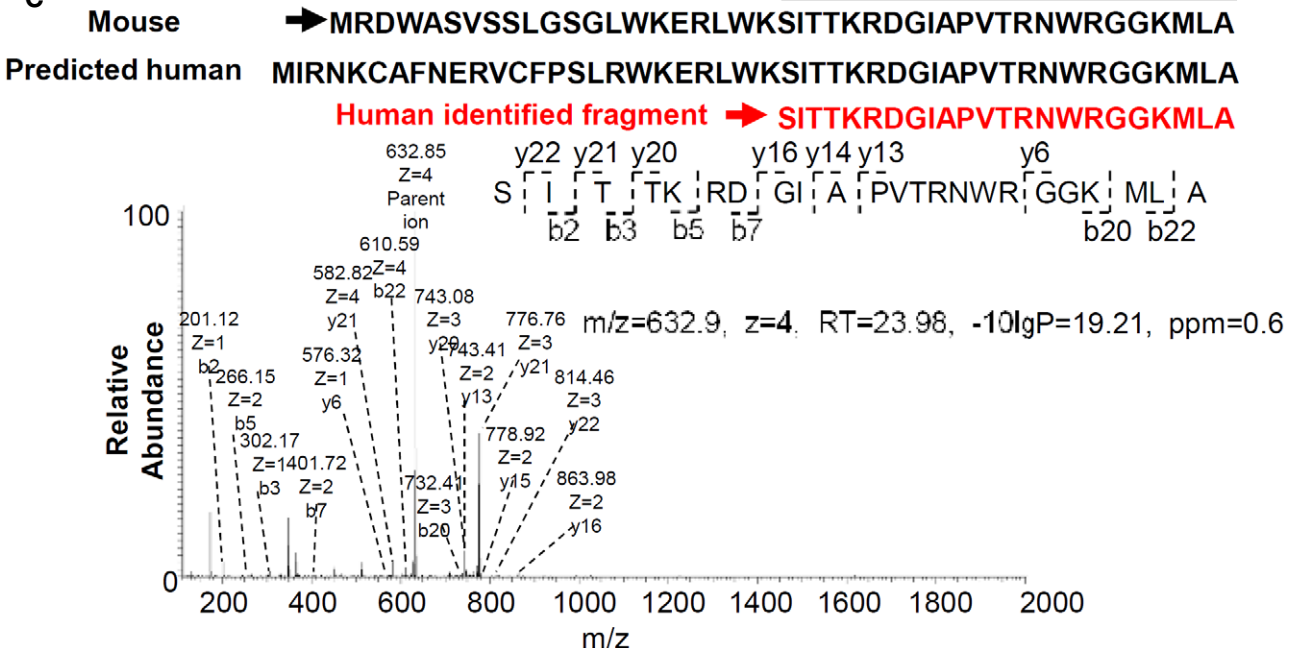

Figure EV4.

**Figure EV5. Secondary structures of scPEP and miPEP31.**

- A, B miPEP31 or scPEP with the concentration of 100  $\mu\text{g/ml}$  in phosphate buffer (A) or phosphate buffer with 50% TFE (B) was analyzed by circular dichroism. The ratio between molar ellipticity at 222 nm and 207 nm was used to confirm an  $\alpha$ -helical structure of peptides. The arrows indicate the  $\alpha$ -helical structure of miPEP31 and scPEP.
- C Secondary structures of miPEP31 and scPEP.
- D The secondary structure of miPEP31 was predicted by I-TASSER. H, S, and C stands for helix, strand, or coil tend of different residues.
- E The structure model of miPEP31 predicted by I-TASSER.
- F  $\text{CD4}^+$  T cells were activated with anti-CD3/28 and treated with 10  $\mu\text{M}$  FAM-scPEP for 24 h, the fluorescein was detected by flow cytometry.
- G, H C57BL/6 mice were injected intravenously with 100  $\mu\text{g}$  FAM-labeled scPEP. Splenocytes were isolated and stained for CD4 and DAPI. Imaging flow cytometry analysis of FAM-scPEP in  $\text{CD4}^+$  T cells (G) and non-CD4 cells (H). Shown in (G, H) are representative of two independent experiments, scale bar 10  $\mu\text{m}$ .
