# Supplementary material
Source: PubMed Central journal article supplement (PMC9066071)

**Figure 1 panel E**

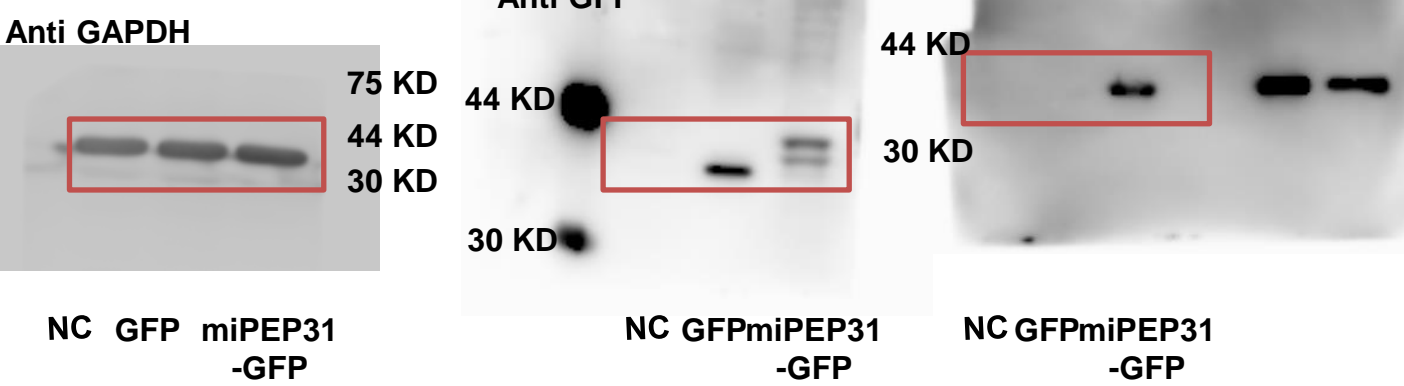

**Figure 1 panel G**

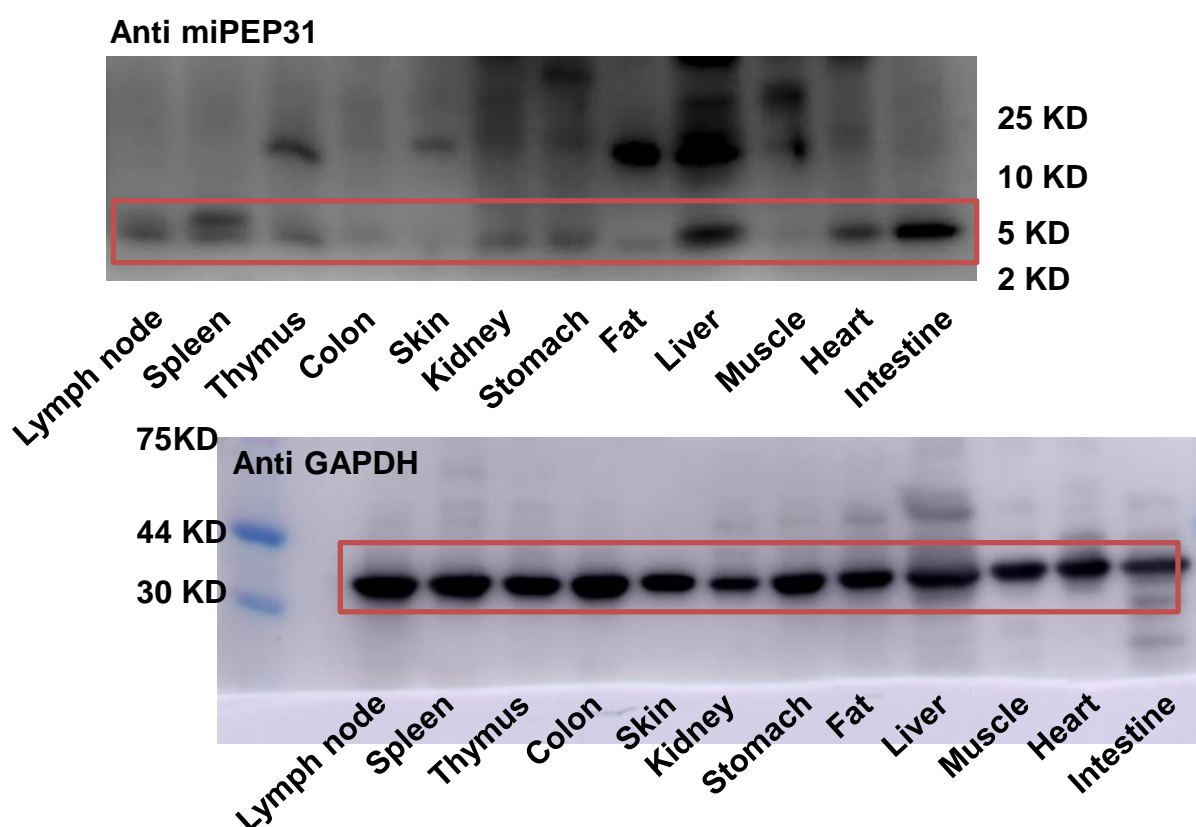

**Figure 1 panel H**

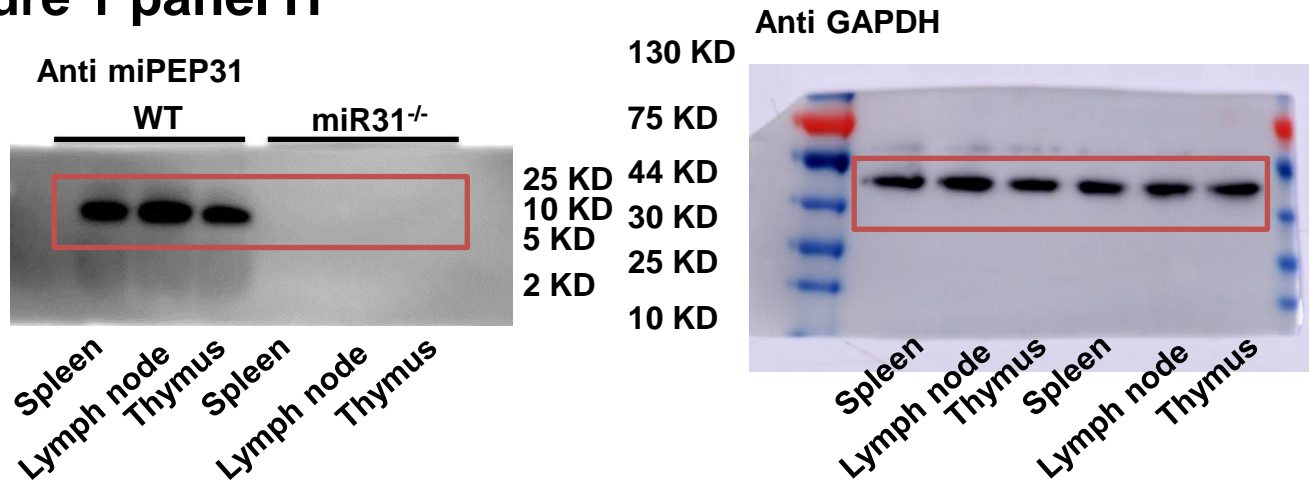

Supplement: EMBR-23-e53475-s002.pdf [file EMBR-23-e53475-s002.pdf]

# Figure 3 panel C

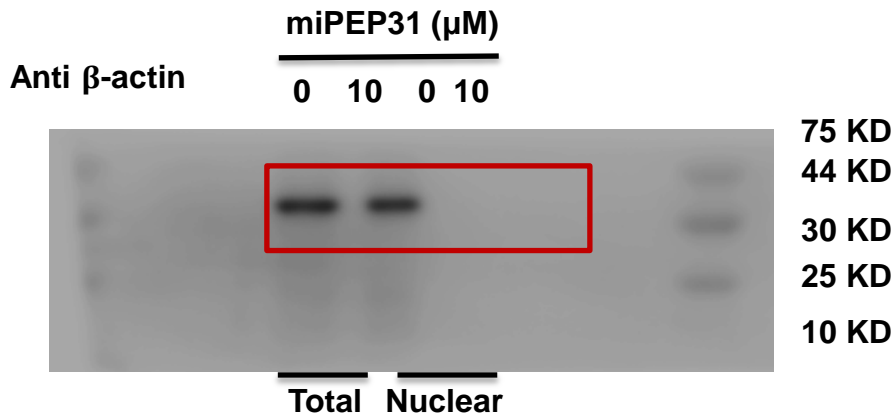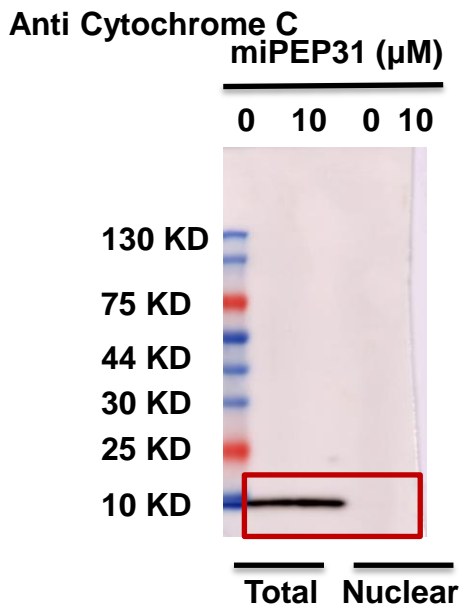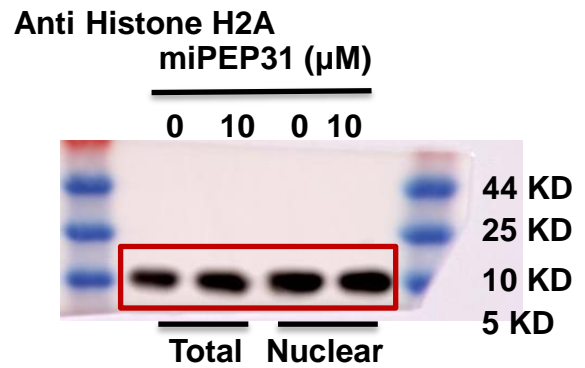

Supplement: EMBR-23-e53475-s004.pdf [file EMBR-23-e53475-s004.pdf]
